# Supplementary material for: Measurement report: Source apportionment and environmental impacts of VOCs in Lhasa, a highland city in China
Source: Copernicus journal article supplement (doi:10.5194/egusphere-2022-1239), 2023-03-09
Supplement: Supplementary file 1 [file egusphere-2022-1239-supplement.pdf]

**Supplement of**

**Source apportionment and environmental impacts of anthropogenic**

**VOCs in Lhasa, a highland city in China**

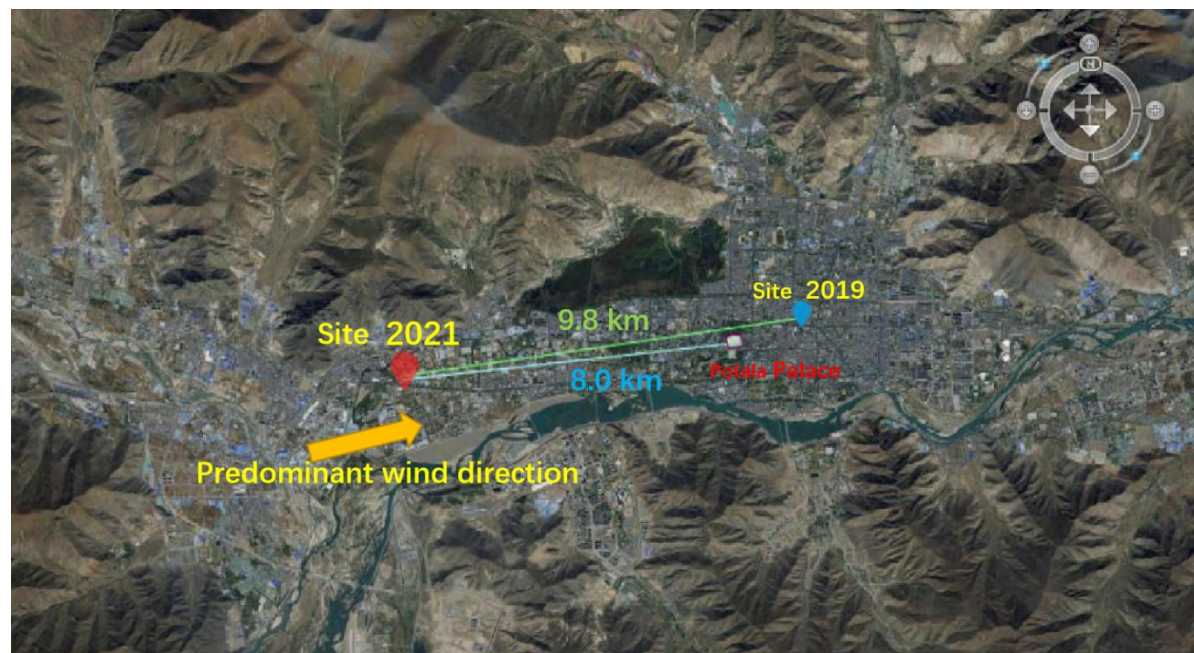

Figure S1. Measurement location in the west corner of the Lhasa city and its relative position to our previous measurement. The site map is available via:<https://zhfw.tianditu.gov.cn/>.

**Table S1 Concentration, standard deviation and sources of measured VOC species**

| <b>Class</b>           | <b>Species</b>         | <b>Mean/ppb</b> | <b>STD</b> | <b>Species Number</b> | <b>S/N</b> | <b>Sources</b>                                   | <b>References</b>         |
|------------------------|------------------------|-----------------|------------|-----------------------|------------|--------------------------------------------------|---------------------------|
| Alkyne                 | Acetylene              | 0.299           | 0.182      | 1                     | 2.33       | Biomass burning, Coal burning, Vehicle emissions | (Liu et al., 2008)        |
| Nitrile                | Acetonitrile           | 1.112           | 1.429      | 2                     | 2.00       | Biomass burning                                  | (Chen et al., 2017)       |
| Alkane                 | Ethane                 | 0.780           | 0.192      | 3                     | 2.33       | Combustion, Vehicle emissions                    | (Stein and Rudolph, 2007) |
|                        | Propane                | 1.283           | 1.748      | 4                     | 2.33       | Combustion, NG/LPG                               | (Liu et al., 2008)        |
|                        | Isobutane              | 0.485           | 0.578      | 5                     | 2.33       | Vehicle emissions                                | (Baudic et al., 2016)     |
|                        | n-Butane               | 0.558           | 0.726      | 6                     | 2.33       | Vehicle emissions                                | (Baudic et al., 2016)     |
|                        | Isopentane             | 0.314           | 0.455      | 7                     | 2.30       | Gasoline evaporation, Vehicle emissions          | (Liu et al., 2008)        |
|                        | n-Pentane              | 0.127           | 0.132      | 8                     | 2.28       | Gasoline evaporation, Vehicle emissions          | (Liu et al., 2008)        |
|                        | Cyclopentane           | 0.002           | 0.011      |                       |            |                                                  |                           |
|                        | 2,2-Dimethylbutane     | 0.009           | 0.008      |                       |            |                                                  |                           |
|                        | 2,3-Dimethylbutane     | 0.088           | 0.177      |                       |            |                                                  |                           |
|                        | 2-Methylpentane        | 0.034           | 0.069      |                       |            |                                                  |                           |
|                        | 3-methylpentane        | 0.044           | 0.062      |                       |            |                                                  |                           |
|                        | n-Hexane               | 0.050           | 0.040      |                       |            |                                                  |                           |
|                        | 2,4-Dimethylpentane    | 0.009           | 0.007      |                       |            |                                                  |                           |
|                        | Methylcyclopentane     | 0.016           | 0.022      |                       |            |                                                  |                           |
|                        | 2-Methylhexane         | 0.016           | 0.018      |                       |            |                                                  |                           |
|                        | Cyclohexane            | 0.008           | 0.006      |                       |            |                                                  |                           |
|                        | 2,3-Dimethylpentane    | 0.006           | 0.009      |                       |            |                                                  |                           |
|                        | 3-Methylhexane         | 0.020           | 0.021      |                       |            |                                                  |                           |
|                        | 2,2,4-Trimethylpentane | 0.014           | 0.013      |                       |            |                                                  |                           |
|                        | n-Heptane              | 0.039           | 0.029      |                       |            |                                                  |                           |
| Methylcyclohexane      | 0.006                  | 0.008           |            |                       |            |                                                  |                           |
| 2,3,4-Trimethylpentane | 0.004                  | 0.004           |            |                       |            |                                                  |                           |
| 2-methylheptane        | 0.007                  | 0.006           |            |                       |            |                                                  |                           |
| 3-Methylheptane        | 0.006                  | 0.006           |            |                       |            |                                                  |                           |
| Octane                 | 0.034                  | 0.030           |            |                       |            |                                                  |                           |
| n-Nonane               | 0.022                  | 0.017           |            |                       |            |                                                  |                           |
| n-Decane               | 0.012                  | 0.007           |            |                       |            |                                                  |                           |
| Undecane               | 0.050                  | 0.146           |            |                       |            |                                                  |                           |

| Class              | Species                | Mean/ppb | STD   | Species Number | S/N  | Sources                                                 | References                                        |
|--------------------|------------------------|----------|-------|----------------|------|---------------------------------------------------------|---------------------------------------------------|
| Alkene             | Ethylene               | 0.405    | 0.273 | 9              | 2.32 | Combustion, Biogenic                                    | (Baudic et al., 2016)<br>(Goldstein et al., 1996) |
|                    | Propene                | 0.219    | 0.191 | 10             | 2.31 | Combustion, Biogenic                                    | (Wang et al., 2009)<br>(Sindelarova et al., 2014) |
|                    | trans-2-Butene         | 0.029    | 0.076 | 11             | 0.75 | Vehicle emissions                                       | (Liu et al., 2008)                                |
|                    | 1-Butene               | 0.068    | 0.070 | 12             | 2.00 | Vehicle emissions                                       | (Liu et al., 2008)                                |
|                    | 1,3-Butadiene          | 0.073    | 0.100 | 13             | 2.01 | Vehicle emissions, Biomass burning                      | (Liu et al., 2008)                                |
|                    | 1-Pentene              | 0.037    | 0.033 | 14             | 1.76 | Vehicle emissions                                       | (Liu et al., 2008)                                |
|                    | trans-2-Pentene        | 0.016    | 0.026 | 15             | 1.03 | Vehicle emissions                                       | (Liu et al., 2008)                                |
|                    | Isoprene               | 0.175    | 0.255 | 16             | 2.01 | Biogenic sources                                        | (Sindelarova et al., 2014)                        |
|                    | cis-2-Butene           | 0.005    | 0.032 |                |      |                                                         |                                                   |
|                    | cis-2-Pentene          | 0.021    | 0.034 |                |      |                                                         |                                                   |
|                    | 1-Hexene               | 0.038    | 0.033 |                |      |                                                         |                                                   |
| Aromatic           | Benzene                | 0.086    | 0.061 | 17             | 2.30 | Biomass burning, Vehicle emissions, Industrial          | (Liu et al., 2008)                                |
|                    | Toluene                | 0.278    | 0.526 | 18             | 2.32 | Solvent, Biomass burning, Vehicle emissions, Industrial | (Liu et al., 2008)                                |
|                    | Ethylbenzene           | 0.075    | 0.076 | 19             | 2.26 | Solvent, Biomass burning, Vehicle emissions, Industrial | (Liu et al., 2008)                                |
|                    | m/p-Xylene             | 0.156    | 0.146 | 20             | 2.31 | Solvent, Biomass burning, Vehicle emissions, Industrial | (Liu et al., 2008)                                |
|                    | o-Xylene               | 0.158    | 0.143 | 21             | 2.31 | Solvent, Biomass burning, Vehicle emissions, Industrial | (Liu et al., 2008)                                |
|                    | Styrene                | 0.029    | 0.024 | 22             | 2.10 | Solvent, Vehicle emissions, Industrial                  | (Yuan et al., 2010)                               |
|                    | n-Propylbenzene        | 0.005    | 0.004 | 23             | 0.29 | Solvent                                                 | (Yuan et al., 2010)                               |
|                    | 3-Ethyltoluene         | 0.013    | 0.014 | 24             | 1.23 | Solvent                                                 | (Yuan et al., 2010)                               |
|                    | 4-Ethyltoluene         | 0.007    | 0.007 | 25             | 0.52 | Solvent                                                 | (Yuan et al., 2010)                               |
|                    | 1,3,5-Trimethylbenzene | 0.007    | 0.007 | 26             | 0.51 | Solvent                                                 | (Yuan et al., 2010)                               |
|                    | 2-Ethyltoluene         | 0.006    | 0.006 | 27             | 0.43 | Solvent                                                 | (Yuan et al., 2010)                               |
|                    | 1,2,4-Trimethylbenzene | 0.017    | 0.021 | 28             | 1.47 | Solvent                                                 | (Yuan et al., 2010)                               |
|                    | Isopropylbenzene       | 0.003    | 0.003 |                |      |                                                         |                                                   |
|                    | 1,2,3-Trimethylbenzene | 0.005    | 0.005 |                |      |                                                         |                                                   |
| 1,3-Diethylbenzene | 0.001                  | 0.001    |       |                |      |                                                         |                                                   |
| 1,4-Diethylbenzene | 0.003                  | 0.003    |       |                |      |                                                         |                                                   |

| Class               | Species                   | Mean/ppb | STD   | Species Number | S/N  | Sources                          | References                   |
|---------------------|---------------------------|----------|-------|----------------|------|----------------------------------|------------------------------|
| Halohydrocarbon     | Chloromethane             | 0.900    | 0.164 | 29             | 2.33 | Biomass burning                  | (Liu et al., 2008)           |
|                     | Freon11(CCl3F)            | 0.321    | 0.016 | 30             | 2.33 | Background compounds             | (Saeaw and Thepanondh, 2015) |
|                     | Dichloromethane           | 0.273    | 0.215 | 31             | 2.33 | Solvent, Industrial              | (Huang et al., 2014)         |
|                     | Chloroform                | 0.040    | 0.030 | 32             | 2.23 | Industrial solvents or additives | (Cai et al., 2010)           |
|                     | 1,2-Dichloroethane        | 0.084    | 0.074 | 33             | 2.28 | Industrial solvents or additives | (Cai et al., 2010)           |
|                     | Freon114(C2Cl2F4)         | 0.028    | 0.003 |                |      |                                  |                              |
|                     | Vinyl chloride            | 0.009    | 0.018 |                |      |                                  |                              |
|                     | Bromomethane              | 0.003    | 0.002 |                |      |                                  |                              |
|                     | Chloroethane              | 0.005    | 0.007 |                |      |                                  |                              |
|                     | 1,1-Dichloroethylene      | 0.001    | 0.001 |                |      |                                  |                              |
|                     | Freon113(C2Cl3F3)         | 0.098    | 0.004 |                |      |                                  |                              |
|                     | 1,1-Dichloroethane        | 0.050    | 0.129 |                |      |                                  |                              |
|                     | cis-1,2-Dichloroethylene  | 0.001    | 0.002 |                |      |                                  |                              |
|                     | 1,1,1-Trichloroethane     | 0.003    | 0.001 |                |      |                                  |                              |
|                     | Tetrachloromethane        | 0.110    | 0.008 |                |      |                                  |                              |
|                     | Trichloroethylene         | 0.002    | 0.007 |                |      |                                  |                              |
|                     | 1,2-Dichloropropane       | 0.038    | 0.049 |                |      |                                  |                              |
|                     | Bromodichloromethane      | 0.002    | 0.001 |                |      |                                  |                              |
|                     | trans-1,3-Dichloropropene | 0.002    | 0.003 |                |      |                                  |                              |
|                     | cis-1,3-Dichloropropene   | 0.000    | 0.000 |                |      |                                  |                              |
|                     | 1,1,2-Trichloroethane     | 0.010    | 0.014 |                |      |                                  |                              |
|                     | Tetrachloroethylene       | 0.010    | 0.019 |                |      |                                  |                              |
|                     | 1,2-Dibromoethane         | 0.000    | 0.001 |                |      |                                  |                              |
|                     | Chlorobenzene             | 0.002    | 0.002 |                |      |                                  |                              |
|                     | 1,3-Dichlorobenzene       | 0.002    | 0.001 |                |      |                                  |                              |
|                     | 1,4-Dichlorobenzene       | 0.002    | 0.001 |                |      |                                  |                              |
| Benzylchloride      | 0.001                     | 0.001    |       |                |      |                                  |                              |
| 1,2-Dichlorobenzene | 0.001                     | 0.001    |       |                |      |                                  |                              |

| Class     | Species                 | Mean/ppb | STD   | Species Number | S/N  | Sources                                                   | References              |
|-----------|-------------------------|----------|-------|----------------|------|-----------------------------------------------------------|-------------------------|
| OVOC      | Acetaldehyde            | 3.591    | 3.441 | 34             | 2.33 | Combustion, Vehicle emissions, Second formation           | (Baudic et al., 2016)   |
|           | Acrolein                | 0.247    | 0.154 | 35             | 2.31 | Vehicle emissions, Cooking, Second formation              | (Sha et al., 2021)      |
|           | Propanal                | 0.717    | 0.508 | 36             | 2.33 | Biomass burning, Second formation                         | (Zhang et al., 2013)    |
|           | Acetone                 | 2.530    | 0.834 | 37             | 2.33 | Solvent, Combustion, Second formation                     | (Sha et al., 2021)      |
|           | Methyl Tert-Butyl Ether | 0.099    | 0.164 | 38             | 2.22 | Gasoline vehicle emissions                                | (Zhang et al., 2013)    |
|           | Methacrolein            | 0.078    | 0.060 | 39             | 2.27 | Biogenic sources                                          | (Guenther et al., 2012) |
|           | n-Butanal               | 0.512    | 0.379 | 40             | 2.33 | Second formation                                          | (Liu et al., 2009)      |
|           | Methyl Vinyl Ketone     | 0.190    | 0.119 | 41             | 2.32 | Biogenic sources                                          | (Guenther et al., 2012) |
|           | Methyl Ethyl Ketone     | 0.346    | 0.186 | 42             | 2.33 | Second formation                                          | (Mellouki et al., 2015) |
|           | 2-Pentanone             | 0.067    | 0.056 | 43             | 2.17 | Second formation                                          | (Mellouki et al., 2015) |
|           | n-Pentanal              | 0.453    | 0.474 | 44             | 2.32 |                                                           |                         |
|           | 3-Pentanone             | 0.040    | 0.040 | 45             | 2.00 |                                                           |                         |
|           | n-Hexanal               | 0.465    | 0.505 | 46             | 2.33 |                                                           |                         |
| Inorganic | BC (ug/m <sup>3</sup> ) | 0.8      | 0.6   | 47             | 2.98 | Biomass burning, Diesel vehicle emissions                 | (Gentner et al., 2017)  |
|           | NOx                     | 5.00     | 5.38  | 48             | 2.33 | Combustion, Vehicle emissions (especially diesel vehicle) | (Gentner et al., 2017)  |
|           | NO                      | 3.98     | 4.53  | 49             | 2.33 | Combustion, Vehicle emissions (especially diesel vehicle) | (Gentner et al., 2017)  |
|           | CO (ppm)                | 0.138    | 0.035 | 50             | 3.50 | Combustion, Vehicle emissions                             | (Gentner et al., 2017)  |
|           | O <sub>3</sub>          | 49.6     | 12.9  |                |      |                                                           |                         |

**Table S2 Comparison of various VOCs concentrations with other observed results in Lhasa (ppb)**

| <b>Period</b>         | <b>Latitude</b> | <b>Longitude</b> | <b>Species</b> | <b>TVOCs</b> | <b>Alkanes</b> | <b>Alkenes</b> | <b>Aromatics</b> | <b>OVOC</b> | <b>Halohydrocarbons</b> | <b>Others</b> |
|-----------------------|-----------------|------------------|----------------|--------------|----------------|----------------|------------------|-------------|-------------------------|---------------|
| 1998.6 <sup>a</sup>   | 29.67           | 91.13            | 69             | 113.5        | 24.2           | 22.9           | 55.0             | -           | -                       | 11.4          |
| 2019 <sup>b</sup>     | 29.65           | 91.14            | 107            | 49.8         | 30.5           | 4.5            | 2.5              | 5.8         | 4.5                     | 2.1           |
| 2019.05 <sup>c</sup>  | 29.65           | 91.13            | 55             | 21.5         | 12.4           | 4.5            | 4.6              | -           | -                       | -             |
| 2021.5-6 <sup>*</sup> | 29.63           | 91.02            | 98             | 18.7         | 4.0            | 1.1            | 0.9              | 9.3         | 2.0                     | 1.4           |

a.(Yu et al., 2001), b.(Yu et al., 2022), c.(Guo et al., 2022), \* This study.

## References:

- Baudic, A., Gros, V., Sauvage, S., Locoge, N., Sanchez, O., Sarda-Esteve, R., Kalogridis, C., Petit, J.-E., Bonnaire, N., Baisnee, D., Favez, O., Albinet, A., Sciare, J., and Bonsang, B.: Seasonal variability and source apportionment of volatile organic compounds (VOCs) in the Paris megacity (France), *A Atmos. Chem. Phys.*, 16, 11961–11989, <https://doi.org/10.5194/acp-16-11961-2016>, 2016.
- Cai, C., Geng, F., Tie, X., Yu, Q., and An, J.: Characteristics and source apportionment of VOCs measured in Shanghai, China, *Atmos. Environ.*, 44, 5005–5014, <https://doi.org/10.1016/j.atmosenv.2010.07.059>, 2010.
- Chen, J., Li, C., Ristovski, Z., Milic, A., Gu, Y., Islam, M. S., Wang, S., Hao, J., Zhang, H., He, C., Guo, H., Fu, H., Miljevic, B., Morawska, L., Thai, P., Lam, Y. F., Pereira, G., Ding, A., Huang, X., and Dumka, U. C.: A review of biomass burning: Emissions and impacts on air quality, health and climate in China, *Sci Total Environ.*, 579, 1000–1034, <https://doi.org/10.1016/j.scitotenv.2016.11.025>, 2017.
- Gentner, D. R., Jathar, S. H., Gordon, T. D., Bahreini, R., Day, D. A., El Haddad, I., Hayes, P. L., Pieber, S. M., Platt, S. M., de Gouw, J., Goldstein, A. H., Harley, R. A., Jimenez, J. L., Prevot, A. S. H., and Robinson, A. L.: Review of Urban Secondary Organic Aerosol Formation from Gasoline and Diesel Motor Vehicle Emissions, *Environ. Sci. Technol.*, 51, 1074–1093, <https://doi.org/10.1021/acs.est.6b04509>, 2017.
- Goldstein, A. H., Fan, S. M., Goulden, M. L., Munger, J. W., and Wofsy, S. C.: Emissions of ethene, propene, and 1-butene by a midlatitude forest, *J. Geophys. Res.: Atmos.*, 101, 9149–9157, <https://doi.org/10.1029/96JD00334>, 1996.
- Guenther, A. B., Jiang, X., Heald, C. L., Sakulyanontvittaya, T., Duhl, T., Emmons, L. K., and Wang, X.: The Model of Emissions of Gases and Aerosols from Nature version 2.1 (MEGAN2.1): an extended and updated framework for modeling biogenic emissions, *Geosci. Model Dev.*, 5, 1471–1492, <https://doi.org/10.5194/gmd-5-1471-2012>, 2012.
- Guo, S., Wang, Y., Zhang, T., Ma, Z., Ye, C., Lin, W., Yang Zong, D. J., and Yang Zong, B. M.: Volatile organic compounds in urban Lhasa: variations, sources, and potential risks, *Front. Environ. Sci.*, 10, <https://doi.org/10.3389/fenvs.2022.941100>, 2022.
- Huang, B., Lei, C., Wei, C., and Zeng, G.: Chlorinated volatile organic compounds (Cl-VOCs) in environment — sources, potential human health impacts, and current remediation technologies, *Environ. Int.*, 71, 118–138, <https://doi.org/10.1016/j.envint.2014.06.013>, 2014.
- Liu, Y., Shao, M., Fu, L., Lu, S., Zeng, L., and Tang, D.: Source profiles of volatile organic compounds (VOCs) measured in China: Part I, *Atmos. Environ.*, 42, 6247–6260, <https://doi.org/10.1016/j.atmosenv.2008.01.070>, 2008.
- Liu, Y., Shao, M., Kuster, W. C., Goldan, P. D., Li, X., Lu, S., and de Gouw, J. A.: Source identification of reactive hydrocarbons and oxygenated VOCs in the summertime in Beijing, *Environ. Sci. Technol.*, 43, 75–81, <https://doi.org/10.1021/es801716n>, 2009.
- Mellouki, A., Wallington, T. J., and Chen, J.: Atmospheric Chemistry of Oxygenated Volatile Organic Compounds: Impacts on Air Quality and Climate, *Chem. Rev.*, 115, 3984–4014, <https://doi.org/10.1021/cr500549n>, 2015.
- Saeaw, N. and Thepanondh, S.: Source apportionment analysis of airborne VOCs using positive matrix factorization in industrial and urban areas in Thailand, *Atmos. Pollut. Res.*, 6, 644–650, <https://doi.org/10.5094/apr.2015.073>, 2015.
- Sha, Q., Zhu, M., Huang, H., Wang, Y., Huang, Z., Zhang, X., Tang, M., Lu, M., Chen, C., Shi, B., Chen, Z., Wu, L., Zhong, Z., Li, C., Xu, Y., Yu, F., Jia, G., Liao, S., Cui, X., Liu, J., and Zheng, J.: A newly integrated dataset of volatile organic compounds (VOCs) source profiles and implications for the future development of VOCs profiles in China, *Sci. Total Environ.*, 793, 148348, <https://doi.org/10.1016/j.scitotenv.2021.148348>, 2021.



Sindelarova, K., Granier, C., Bouarar, I., Guenther, A., Tilmes, S., Stavrakou, T., Müller, J. F., Kuhn, U., Stefani, P., and Knorr, W.: Global data set of biogenic VOC emissions calculated by the MEGAN model over the last 30 years, *Atmos. Chem. Phys.*, 14, 9317–9341, <https://doi.org/10.5194/acp-14-9317-2014>, 2014.

Stein, O. and Rudolph, J.: Modeling and interpretation of stable carbon isotope ratios of ethane in global chemical transport models, *J. Geophys. Res.*, 112, D14308, <https://doi.org/10.1029/2006jd008062>, 2007.

Wang, S., Wei, W., Li, D., Li, G., and Hao, J.: Characteristics of gaseous pollutants from biofuel-stoves in rural China, *Atmos. Environ.*, 43, 4148–4154, <https://doi.org/10.1016/j.atmosenv.2009.05.040>, 2009.

Yu, J., Han, Y., Chen, M., Zhang, H., Chen, Y., and Liu, J.: Characteristics and Source Apportionment of Ambient VOCs in Lhasa, *Environmental Science (in Chinese)*, 43, 113–122, <https://doi.org/10.13227/jhjkx.202104038>, 2022.

Yu, X. L., Tang, J., Zhou, L. X., Xue, H. S., and Xue, X. J.: Emission Characteristics and Sources of Non-methane Hydrocarbons at Lhasa Area, *Acta Scientiae Circumstantiae (in Chinese)*, 21, 203–207, 2001.

Yuan, B., Shao, M., Lu, S., and Wang, B.: Source profiles of volatile organic compounds associated with solvent use in Beijing, China, *Atmos. Environ.*, 44, 1919–1926, <https://doi.org/10.1016/j.atmosenv.2010.02.014>, 2010.

Zhang, Y. S., Shao, M., Lin, Y., Luan, S. J., Mao, N., Chen, W. T., and Wang, M.: Emission inventory of carbonaceous pollutants from biomass burning in the Pearl River Delta Region, China, *Atmos. Environ.*, 76, 189–199, <https://doi.org/10.1016/j.atmosenv.2012.05.055>, 2013.
